# Supplementary material
Source: PubMed Central journal article supplement (PMC6643363)
Supplement: ao6b00176_si_001.pdf [file ao6b00176_si_001.pdf]

Supporting information for: Folate Receptor  
Targeted Theranostic Nanoconstruct for Surface-  
Enhanced Raman Scattering (SERS) Imaging and  
Photodynamic Therapy (PDT)

*Andrew M. Fales,<sup>†,‡,&,#</sup> Bridget M. Crawford,<sup>†,‡,&</sup> Tuan Vo-Dinh<sup>†,‡,§,\*</sup>*

Fitzpatrick Institute for Photonics, Department of Biomedical Engineering, and Department of  
Chemistry, Duke University, 101 Science Drive, Box 90281, Durham, North Carolina 27708,  
United States

\* Phone: (919) 660-8520, Fax: (919) 613-9145, Email: [tuan.vodinh@duke.edu](mailto:tuan.vodinh@duke.edu)

† Fitzpatrick Institute for Photonics

‡ Department of Biomedical Engineering

§ Department of Chemistry

& These authors contributed equally to this work.

# Current affiliation: Center for Devices and Radiological Health, U.S. Food and Drug  
Administration, 10903 New Hampshire Ave, Building 62, Room G205C, Silver Spring, MD  
20993; [andrew.fales@fda.hhs.gov](mailto:andrew.fales@fda.hhs.gov)

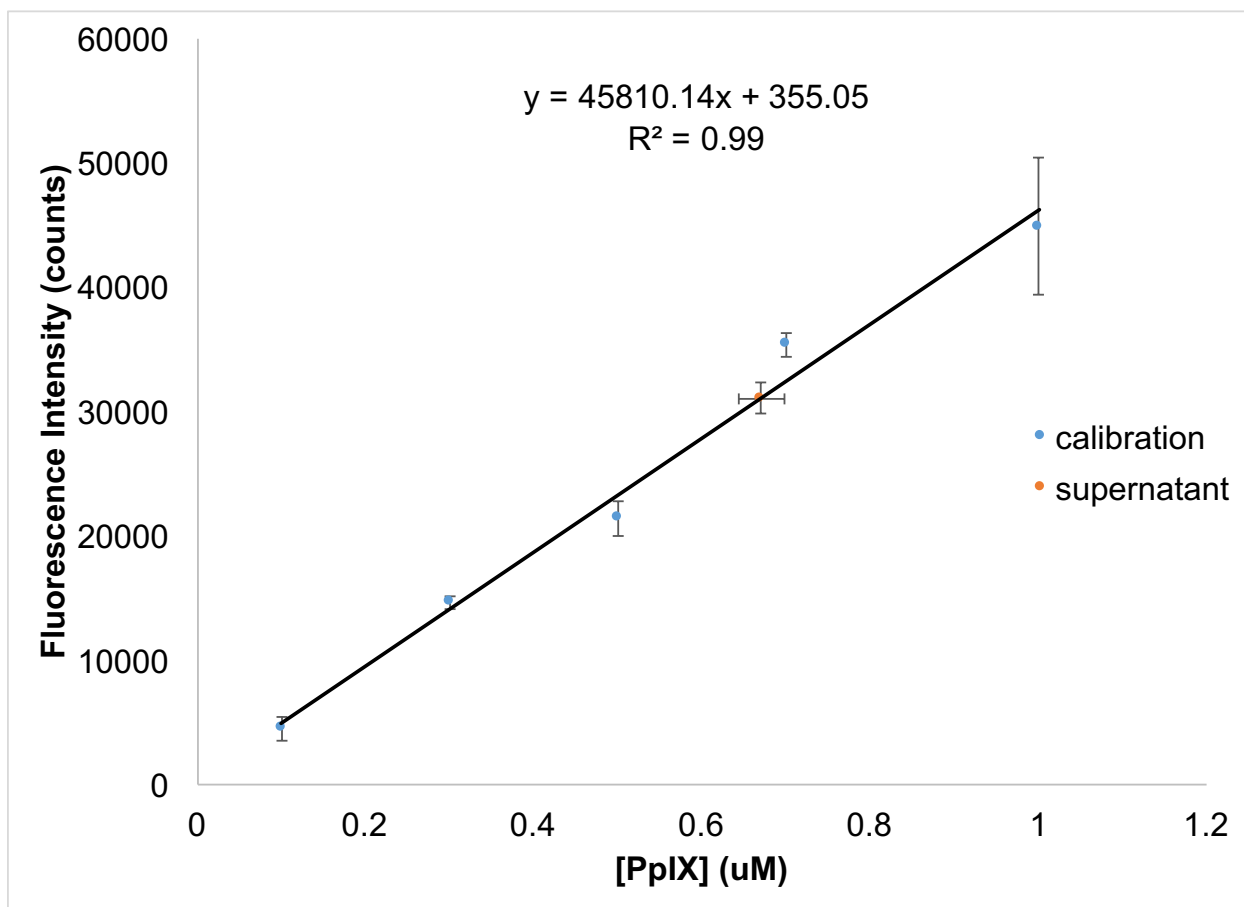

Figure S1. Calibration curve for the quantitation of PpIX encapsulated in the theranostic nanoparticles. Of the initial 1 µM PpIX, there was found to be  $0.67 \pm 0.03$  µM remaining in the supernatant after silica coating. This results in an estimated  $0.33 \pm 0.03$  µM loaded on 0.1 nM of particles.

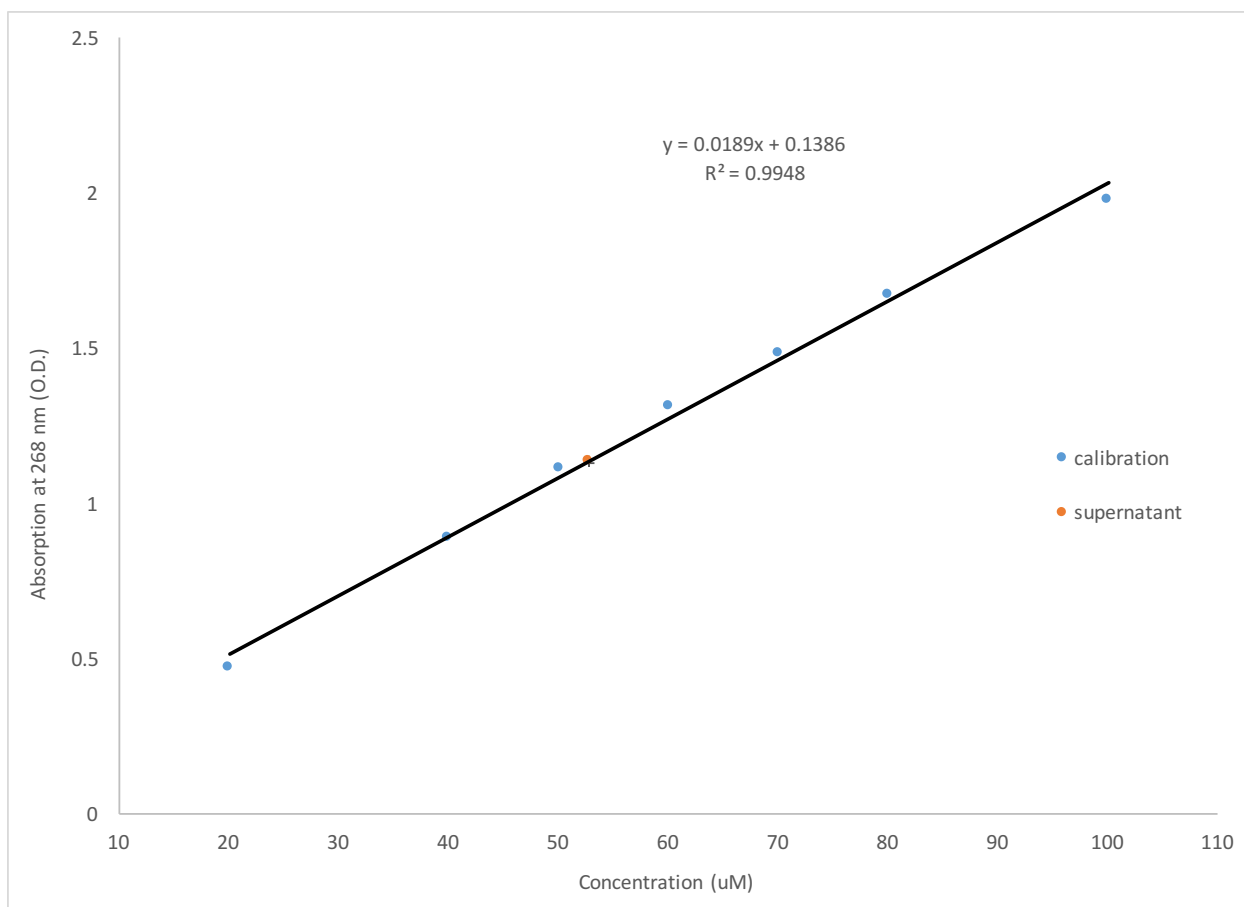

Figure S2. Calibration curve for the quantitation of FA-PEG conjugated to the theranostic nanoparticles. After the conjugation reaction, the particles were spun down by centrifugation, the supernatant was collected, diluted 10x, and measured on a UV/Vis spectrophotometer. The FA absorption at 268 nm was used to quantify the remaining FA-PEG in the supernatant. Of the initial 58.8  $\mu\text{M}$  FA-PEG,  $52.8 \pm 0.2 \mu\text{M}$  remained in the supernatant after conjugation. This corresponds to  $0.204 \pm 0.007 \text{ mg}$  of the initial 2 mg incorporated onto the particles.

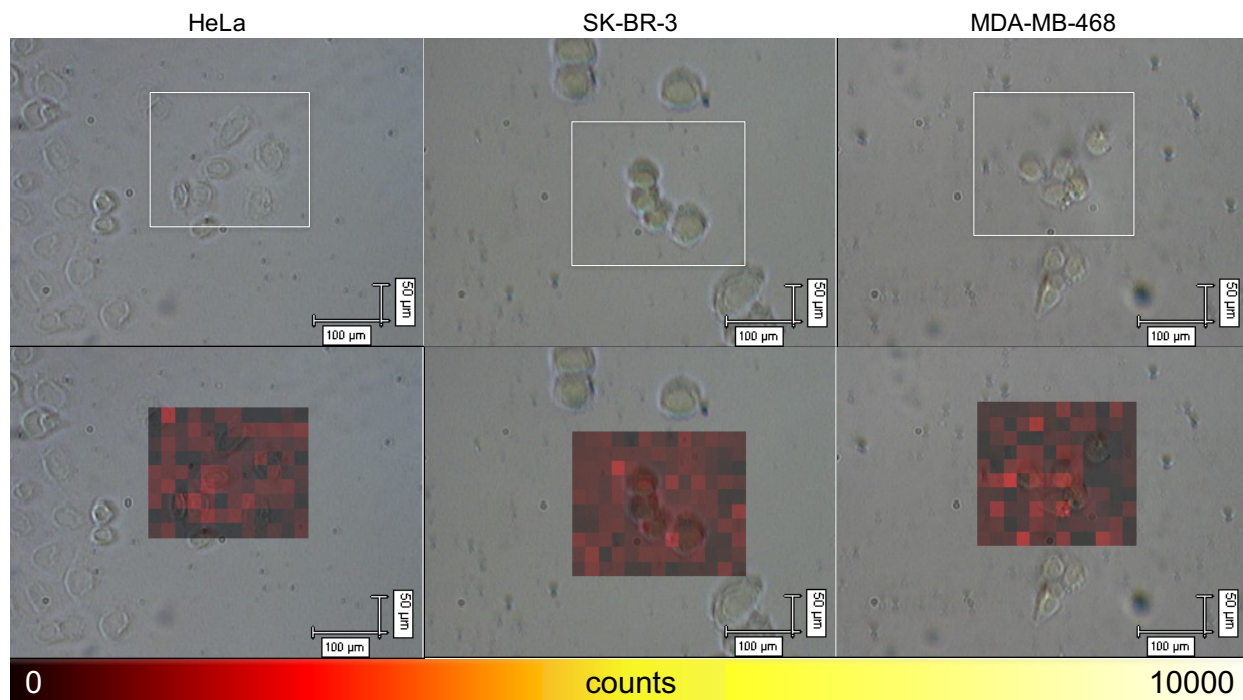

Figure S3. Raman mapping of the three different cell lines after 4 hr incubation with untargeted theranostic nanoparticles at 0.1 nM concentration. The sample was scanned in a grid pattern with 20  $\mu\text{m}$  step size, taking a 1 s acquisition at each point. The Raman peak intensity at each point was then integrated to create the false-color map that is overlaid on the brightfield image. All cell lines show little to no Raman signal, indicating that cellular uptake of untargeted nanoparticles is minimal over the 4 hr incubation period.

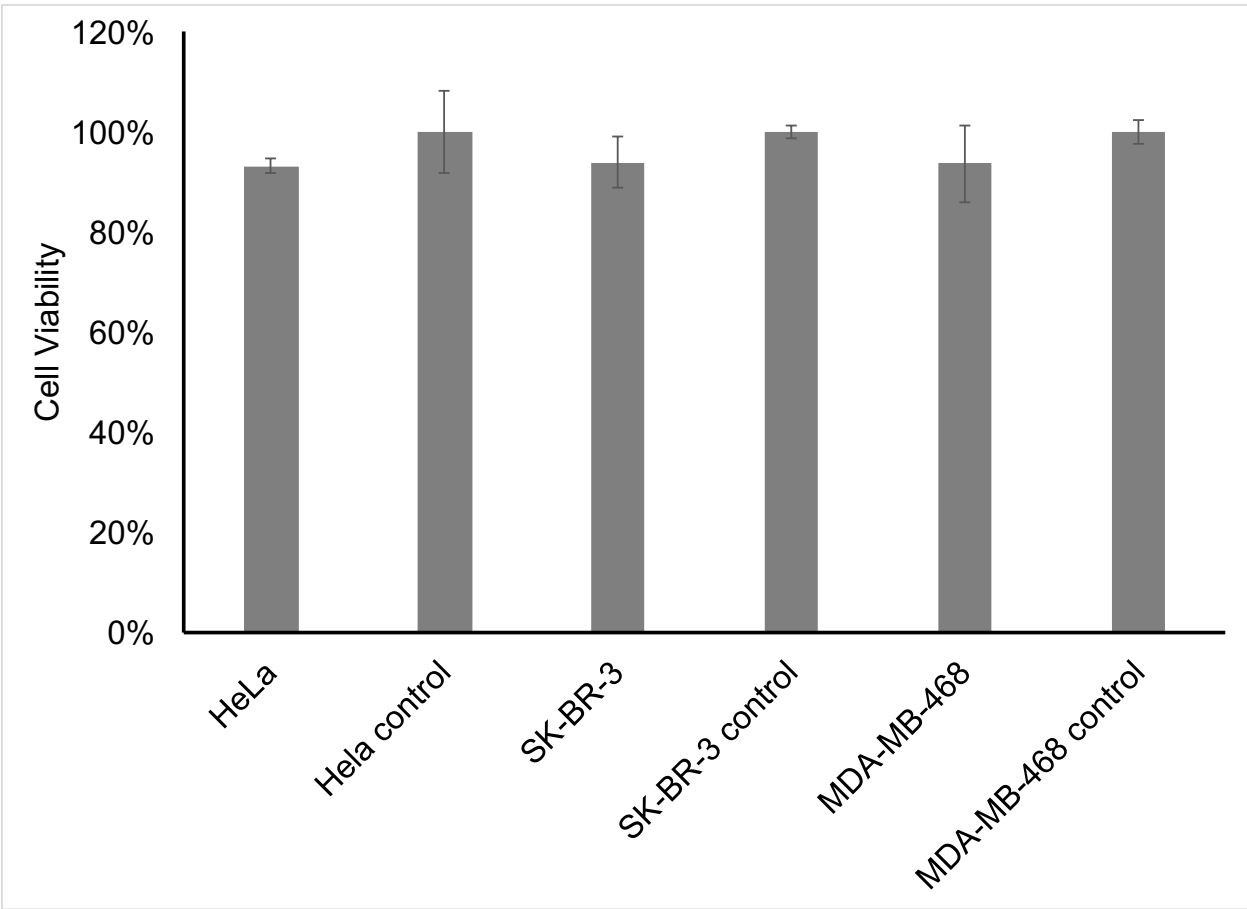

Figure S4. Resazurin-based cell viability assay of the three cell lines after 4 hr incubation with the theranostic nanoparticles. There is a slight decrease in viability observed after particle incubation, though none are statistically significant.
